# Supplementary material
Source: publisher figshare collection journal article supplement (https://gsajournals.figshare.com/ndownloader/files/29151993)
Supplement: Supplementary file 1 [file 29151993]

| **Table S2. Primer sequences used** | | |
| --- | --- | --- |
|  | **Primer name** | **Sequence (5’-3’)** |
| **qRT-PCR primers** | | |
| 1 | *act1+* (*SPBC32H8.12c*)-F | GCGTTGGTTATTGATAATGGCTCT |
| 2 | *act1+* (*SPBC32H8.12c*)-R | AGGTCAAAATACCACGCTTGCTT |
| 3 | *obr1*+ (*SPAC3C7.14c*)-F | AAAGGCTGGCATTGAGAA |
| 4 | *obr1*+ (*SPAC3C7.14c*)-R | TGCGTTAAGACATCGAGTGT |
| 5 | *caf5*+ (*SPBC609.04*)-F | CTTCGGCTCGCCAGCTCTA |
| 6 | *caf5*+ (*SPBC609.04*)-R | CGACCATCGCTCCACCAA |
| 7 | *SPCC663.08c*-F | GAAATCGAGGCATTGGAC |
| 8 | *SPCC663.08c*-R | CGGCTTCATTGGCACTCT |
| 9 | *srx1*+ (*SPBC106.02c*)-F | GCGGTTTGACTTCAGAAGATTTG |
| 10 | *srx1*+ (*SPBC106.02c*)-R | ACAGGCGTAGAGTGTTAGGGGAG |
| 11 | *ctt1*+ (*SPCC757.07c*)-F | GTGGGTTCGCATTAAAGTTCTAC |
| 12 | *ctt1*+ (*SPCC757.07c*)-R | GTTACGCTTCTGAGTATGGATGA |
| 13 | *trr1*+ (*SPBC3F6.03*)-F | GGTTGTTATTATTGGGTCTGGTC |
| 14 | *trr1*+ (*SPBC3F6.03*)-R | CGACATCGGTGGTAGTAGTAAGC |
| 15 | *ssa2*+ (*SPCC1739.13*)-F | ACACTTTTCCAACAACCGTGTCGAA |
| 16 | *ssa2*+ (*SPCC1739.13*)-R | GTTCATGGCGACTTGGTTCTTAGCA |
| 17 | *wis2*+ (*SPAC1B3.03c*)-F | GTAATGGAACGGGTGGAGAAAGCA |
| 18 | *wis2*+ (*SPAC1B3.03c*)-R | TCCAAATGAGGGGTGGGAACAGTA |
| 19 | *hsp90*+ (*SPAC926.04c*)-F | CTTCCGATGCCTTGGACAAAATTCG |
| 20 | *hsp90*+ (*SPAC926.04c*)-R | TACCGGTATCGCGAATGCTAAGGA |
| 21 | *SPBC36.02c*-F | TCCTATTATTTGGGCTCCGCTGTCT |
| 22 | *SPBC36.02c*-R | TCGTTTGAATGTCTTTGCCAACAGC |
| 23 | *pap1*+ (*SPAC1783.07c*)-F | GGCAGAAAGTAAGACAGTTAGAAG |
| 24 | *pap1*+ (*SPAC1783.07c*)-R | TAGTTGGAAGGGAAGACAATGAG |
| **ChIP qRT-PCR primers** | | |
| 25 | *obr1*+ (*SPAC3C7.14c*)-chip-F | CAGAAAATGGGACAGGTAAT |
| 26 | *obr1*+ (*SPAC3C7.14c*)-chip-R | CAAACAAACCGATTTTGTGC |
| 27 | *caf5*+ (*SPBC609.04*)-chip-F | CGTTGATTAGGTAAGGCACGA |
| 28 | *caf5*+ (*SPBC609.04*)-chip-R | TTATTTGCCCACACTTGCTG |
| 29 | *SPCC663.08c*-chip-F | TCACGTAAGCATAATGATTT |
| 30 | *SPCC663.08c*-chip-R | GTGGATAATTTGGTGTCGGC |
| 31 | *gpd3*+ (*SPBC354.12*)-chip-F | TCAAGTGGTCTGCCTCTGG |
| 32 | *gpd3*+ (*SPBC354.12*)-chip-F | CACCGACGACGAACATGG |
